# Supplementary material
Source: publisher figshare collection journal article supplement (https://tandf.figshare.com/ndownloader/files/17659733)
Supplement: Supplementary file 1 [file 17659733]

## Sheet: Appendix 1
	Euclidean distances in Chittka hexagon between pairs of flowers
			Flowers	Blue 1	Blue 2	Blue 3	Blue 4	Blue 5	Blue 6	Blue 7	Blue 8	Blue 9	Blue 10	Blue 11	Blue 12	Red 1	Red 2	Red 3	Red 4	Red 5	Red 6	Red 7	Red 8	Red 9	Red 10	Red 11	Red 12	RedxBlue1	RedxBlue2	RedxBlue3	RedxBlue4	RedxBlue5	RedxBlue6	RedxBlue7	RedxBlue8	RedxBlue9	RedxBlue10	RedxBlue11	RedxBlue12	BluexRed1	BluexRed2	BluexRed3	BluexRed4	BluexRed5	BluexRed6	BluexRed7	BluexRed8	BluexRed9	BluexRed10
Euclidean distances to			x coordinate	-0.304819	-0.345753	-0.307835	-0.347919	-0.313315	-0.362304	-0.345171	-0.340566	-0.35828	-0.329339	-0.38168	-0.356457	-0.22007	-0.233245	-0.24327	-0.230918	-0.222178	-0.253859	-0.223127	-0.232807	-0.253567	-0.23541	-0.239814	-0.233347	-0.203698	-0.193582	-0.207848	-0.177872	-0.166259	-0.257299	-0.206974	-0.198175	-0.195871	-0.213417	-0.193573	-0.206911	-0.210087	-0.21733	-0.216521	-0.20407	-0.182502	-0.205723	-0.240204	-0.221135	-0.218312	-0.146535
hexagon center	Flowers	x coordinate	y coordinate	0.122018	0.118923	0.0954063	0.133271	0.120667	0.118386	0.127076	0.127938	0.134744	0.123964	0.129534	0.131239	-0.117513	-0.121421	-0.096496	-0.141485	-0.107581	-0.103369	-0.123415	-0.120431	-0.135224	-0.135217	-0.140196	-0.115238	-0.0124166	-0.00640527	-0.013627	-0.00438655	-0.0199398	-0.015322	-0.0361255	-0.0400791	-0.0228074	-0.0268163	-0.008964	-0.0660121	-0.0290929	-0.072698	-0.0554293	-0.0500449	-0.00105533	-0.00472885	-0.00458266	0.0041999	-0.0245056	-0.0981641
0.328334	Blue 1	-0.304819	0.122018
0.365633	Blue 2	-0.345753	0.118923	0.0410501
0.322281	Blue 3	-0.307835	0.0954063	0.0267818	0.0446177
0.37257	Blue 4	-0.347919	0.133271	0.0445443	0.0145102	0.0551396
0.335748	Blue 5	-0.313315	0.120667	0.00860238	0.0324845	0.0258481	0.0368277
0.381155	Blue 6	-0.362304	0.118386	0.0575989	0.0165597	0.059117	0.0206997	0.0490417
0.367819	Blue 7	-0.345171	0.127076	0.0406673	0.00817405	0.0489582	0.00677653	0.0324941	0.0192109
0.363804	Blue 8	-0.340566	0.127938	0.0362341	0.0104008	0.0461481	0.00908235	0.0282049	0.0237436	0.00468432
0.38278	Blue 9	-0.35828	0.134744	0.0549543	0.0201802	0.0639694	0.0104651	0.0471168	0.0168462	0.0151869	0.0189757
0.351896	Blue 10	-0.329339	0.123964	0.0245965	0.0171707	0.0357483	0.0207805	0.0163594	0.0334336	0.016135	0.0119104	0.0308835
0.403062	Blue 11	-0.38168	0.129534	0.0772277	0.0374619	0.0813495	0.0339677	0.068938	0.0223548	0.0365922	0.0411449	0.0239738	0.0526372
0.379849	Blue 12	-0.356457	0.131239	0.052455	0.0163182	0.0603994	0.00877685	0.0444189	0.0141206	0.0120299	0.0162301	0.00395044	0.0280776	0.0252806
0.24948	Red 1	-0.22007	-0.117513	0.254081	0.267764	0.230298	0.281491	0.255781	0.27546	0.274725	0.273433	0.287638	0.265048	0.295211	0.283688
0.262957	Red 2	-0.233245	-0.121421	0.253742	0.265373	0.229298	0.279316	0.254986	0.272329	0.27254	0.271473	0.285051	0.263529	0.291567	0.281102	0.0137427
0.26171	Red 3	-0.24327	-0.096496	0.227017	0.238554	0.202473	0.252476	0.22818	0.245648	0.245699	0.244617	0.258262	0.236665	0.265041	0.254312	0.0313042	0.0268654
0.270815	Red 4	-0.230918	-0.141485	0.273669	0.284603	0.249066	0.29863	0.274796	0.291195	0.291854	0.290881	0.304177	0.283107	0.310129	0.300231	0.0263121	0.0201983	0.0466537
0.246853	Red 5	-0.222178	-0.107581	0.244019	0.258021	0.220321	0.271699	0.245771	0.265888	0.264937	0.263601	0.277931	0.255141	0.28577	0.273982	0.0101525	0.017721	0.0238284	0.0350118
0.274098	Red 6	-0.253859	-0.103369	0.231076	0.240537	0.205973	0.254647	0.231791	0.24685	0.247876	0.247024	0.260003	0.239536	0.265672	0.256061	0.0366299	0.027401	0.0126236	0.0444876	0.0319604
0.254984	Red 7	-0.223127	-0.123415	0.258671	0.271596	0.234645	0.285412	0.260211	0.278994	0.27864	0.277435	0.291397	0.269216	0.298533	0.287447	0.00664658	0.0103131	0.0336211	0.019678	0.0158618	0.0366922
0.262113	Red 8	-0.232807	-0.120431	0.252918	0.264664	0.228506	0.278595	0.254185	0.271667	0.271819	0.270739	0.284355	0.262769	0.290939	0.280406	0.0130675	0.00108203	0.0261224	0.0211378	0.016677	0.0270983	0.0101298
0.28737	Red 9	-0.253567	-0.135224	0.262298	0.27035	0.23693	0.284591	0.262774	0.275938	0.277836	0.277171	0.289565	0.270037	0.294126	0.285638	0.0378909	0.024566	0.0400737	0.0234982	0.041826	0.0318572	0.0326505	0.0254907
0.27148	Red 10	-0.23541	-0.135217	0.266434	0.27706	0.241728	0.291108	0.26748	0.283577	0.284333	0.283388	0.296607	0.275676	0.302469	0.292662	0.0234254	0.0139646	0.0395105	0.00771156	0.0306401	0.0368059	0.0170343	0.0150126	0.0181566
0.277788	Red 11	-0.239814	-0.140196	0.270151	0.279938	0.245225	0.294059	0.27102	0.286126	0.287288	0.286439	0.299376	0.278918	0.304762	0.295436	0.030073	0.0198913	0.0438366	0.00898966	0.0370782	0.0394148	0.0236664	0.02097	0.0146232	0.00664784
0.260251	Red 12	-0.233347	-0.115238	0.247787	0.259743	0.223427	0.273648	0.24909	0.266852	0.266872	0.265765	0.279463	0.257744	0.28621	0.275513	0.0134703	0.00618369	0.0212071	0.0263588	0.0135418	0.0236988	0.0130884	0.00522139	0.0284304	0.020085	0.0257825
0.204076	RedxBlue1	-0.203698	-0.0124166	0.16822	0.193467	0.149901	0.204999	0.172416	0.205584	0.198678	0.196042	0.213429	0.185433	0.227657	0.209696	0.106364	0.112938	0.0929264	0.131907	0.0969423	0.103867	0.112686	0.111869	0.132547	0.126829	0.132786	0.107011
0.193688	RedxBlue2	-0.193582	-0.00640527	0.169901	0.197137	0.153034	0.208157	0.174595	0.209857	0.201982	0.19913	0.216907	0.188218	0.232079	0.213248	0.114221	0.121663	0.102885	0.140144	0.105139	0.114172	0.120682	0.120585	0.142101	0.135433	0.141554	0.11587	0.0117676
0.208295	RedxBlue3	-0.207848	-0.013627	0.166742	0.191277	0.147938	0.202974	0.170757	0.203184	0.196608	0.194049	0.21129	0.183552	0.225194	0.207535	0.104602	0.110745	0.090122	0.129922	0.0950406	0.100849	0.110846	0.109682	0.129908	0.124674	0.130543	0.104761	0.00432342	0.0159905
0.177926	RedxBlue4	-0.177872	-0.00438655	0.179147	0.208301	0.163857	0.218782	0.184346	0.221558	0.212771	0.209713	0.227825	0.198535	0.24387	0.224248	0.12074	0.129473	0.112965	0.147003	0.112304	0.124786	0.127341	0.128391	0.151156	0.142924	0.149269	0.123958	0.0270459	0.0158392	0.0313687
0.167451	RedxBlue5	-0.166259	-0.0199398	0.19837	0.226938	0.182616	0.237642	0.203459	0.239932	0.231566	0.228585	0.246575	0.217493	0.2622	0.242962	0.111427	0.121596	0.108589	0.137673	0.103961	0.120972	0.118072	0.120529	0.144614	0.134427	0.140968	0.116544	0.0381872	0.030491	0.0420657	0.0194101
0.257755	RedxBlue6	-0.257299	-0.015322	0.145329	0.160766	0.121716	0.174045	0.147074	0.170011	0.167328	0.165702	0.180878	0.156813	0.190929	0.176954	0.108761	0.108791	0.0823772	0.128891	0.0987182	0.0881137	0.113366	0.107925	0.11996	0.121876	0.126092	0.102747	0.0536798	0.0643383	0.0494797	0.0801767	0.0911569
0.210103	RedxBlue7	-0.206974	-0.0361255	0.185965	0.208085	0.165752	0.220364	0.189453	0.219091	0.213853	0.211575	0.228232	0.201499	0.24076	0.224402	0.082434	0.0892496	0.0704417	0.108046	0.0730553	0.0819747	0.0887711	0.0881752	0.109506	0.103091	0.109129	0.0833926	0.0239342	0.0325982	0.0225154	0.0430617	0.0438141	0.0544554
0.202187	RedxBlue8	-0.198175	-0.0400791	0.194032	0.216935	0.174303	0.22907	0.197728	0.228143	0.222595	0.220239	0.237058	0.210034	0.249885	0.233245	0.0804695	0.0885799	0.072225	0.106561	0.0716426	0.0842986	0.0869907	0.087498	0.110095	0.102165	0.108431	0.0829814	0.0282084	0.0339857	0.0281653	0.0410633	0.0377389	0.0640979	0.00964628
0.197194	RedxBlue9	-0.195871	-0.0228074	0.18123	0.206282	0.162821	0.217897	0.185413	0.218255	0.211555	0.208953	0.226272	0.198383	0.240277	0.222527	0.0977481	0.105459	0.0876171	0.123744	0.0887618	0.0992611	0.104234	0.104378	0.126358	0.119161	0.125344	0.0997391	0.0130091	0.0165611	0.0150913	0.0257544	0.02975	0.0618828	0.0173394	0.0174248
0.215095	RedxBlue10	-0.213417	-0.0268163	0.17466	0.196857	0.154445	0.20909	0.178132	0.207968	0.202588	0.20029	0.216996	0.190191	0.229691	0.213172	0.09094	0.0966603	0.0758057	0.115996	0.0812388	0.0865786	0.0970851	0.0956023	0.115604	0.110609	0.116412	0.0906401	0.0173725	0.0284612	0.0143165	0.0420303	0.0476563	0.0453628	0.0113212	0.0202041	0.0179982
0.19378	RedxBlue11	-0.193573	-0.008964	0.171849	0.198781	0.154755	0.209889	0.176472	0.211396	0.203688	0.200872	0.218587	0.190006	0.233594	0.214915	0.111736	0.11925	0.100656	0.137682	0.102682	0.112012	0.118205	0.118171	0.139789	0.133004	0.139141	0.113473	0.0106978	0.00255874	0.0150181	0.0163546	0.0294362	0.0640429	0.0302877	0.0314537	0.0140328	0.0266926
0.217186	RedxBlue12	-0.206911	-0.0660121	0.211994	0.231253	0.190373	0.244125	0.214874	0.241142	0.237485	0.235543	0.251427	0.226008	0.262264	0.247532	0.0531551	0.0613485	0.0474477	0.0791986	0.0442839	0.059997	0.0596489	0.0602668	0.0834691	0.074843	0.0811537	0.0558753	0.0536918	0.061079	0.0523935	0.0681248	0.0614429	0.0714735	0.0298868	0.0273649	0.044593	0.0397322	0.0585867
0.212092	BluexRed1	-0.210087	-0.0290929	0.17835	0.200783	0.158287	0.212977	0.18189	0.211943	0.206486	0.204166	0.220915	0.194029	0.23368	0.217096	0.0889814	0.095188	0.0751285	0.114306	0.079414	0.0862139	0.0952187	0.0941219	0.114692	0.109103	0.115011	0.08923	0.0178585	0.0280565	0.0156271	0.0405988	0.0447738	0.0491791	0.00769088	0.0162048	0.0155443	0.00403332	0.0260367	0.0370556
0.229167	BluexRed2	-0.21733	-0.072698	0.213468	0.230675	0.19092	0.243878	0.215877	0.239855	0.237177	0.235462	0.250797	0.226323	0.260593	0.246874	0.0448982	0.0512563	0.0352027	0.0701157	0.0352184	0.0476974	0.0510467	0.0501799	0.0722677	0.0650804	0.0711445	0.0454553	0.0618037	0.0704183	0.0598272	0.0788888	0.0734282	0.069925	0.0380106	0.0378274	0.0543102	0.0460484	0.0680181	0.0123801	0.0442026
0.223503	BluexRed3	-0.216521	-0.0554293	0.198202	0.217024	0.176323	0.229941	0.200945	0.226857	0.223291	0.221384	0.237195	0.21192	0.24797	0.233297	0.0621846	0.0680779	0.0490103	0.0872513	0.0524578	0.0607645	0.0683054	0.0670114	0.0879752	0.0819929	0.0879091	0.0621305	0.0448834	0.0541254	0.0426924	0.0640244	0.0615284	0.0571967	0.0215356	0.0239205	0.0386086	0.028781	0.0518232	0.014295	0.0271108	0.0172877
0.210117	BluexRed4	-0.20407	-0.0500449	0.199389	0.220508	0.178671	0.233017	0.202674	0.231099	0.226453	0.224297	0.240681	0.214409	0.252574	0.236824	0.0693389	0.0771085	0.0607811	0.0952996	0.0603184	0.0729544	0.0758041	0.0760269	0.0985161	0.0907547	0.0969788	0.0714651	0.0376301	0.0448824	0.0366133	0.0526408	0.0483322	0.0635529	0.014219	0.0115789	0.028445	0.0250384	0.042401	0.016218	0.0217988	0.0262487	0.0135649
0.182505	BluexRed5	-0.182502	-0.00105533	0.173518	0.202597	0.158156	0.213087	0.178685	0.215858	0.207072	0.204019	0.222124	0.192849	0.238171	0.218546	0.122367	0.130624	0.113145	0.148541	0.113675	0.124739	0.128927	0.129543	0.151827	0.144217	0.150482	0.124991	0.0240486	0.0123035	0.0282927	0.00570436	0.024909	0.0761453	0.0427643	0.0420535	0.0255317	0.0402409	0.0136051	0.0693914	0.0393325	0.0796597	0.0641389	0.0535272
0.205778	BluexRed6	-0.205723	-0.00472885	0.160887	0.18681	0.143017	0.19815	0.165227	0.199185	0.191881	0.189165	0.206703	0.178445	0.221331	0.202998	0.113693	0.119894	0.0991513	0.139057	0.10416	0.109758	0.119955	0.11883	0.138989	0.133822	0.139691	0.113909	0.00795006	0.0122569	0.0091484	0.0278538	0.0422941	0.0526524	0.0314215	0.0361471	0.0205891	0.0233889	0.0128677	0.0612948	0.0247518	0.0689531	0.0518375	0.0453461	0.0235099
0.240248	BluexRed7	-0.240204	-0.00458266	0.142136	0.162462	0.120714	0.174945	0.145026	0.17329	0.16838	0.166236	0.18263	0.156426	0.194943	0.17878	0.114711	0.117045	0.0919644	0.137217	0.104564	0.0997251	0.120053	0.116085	0.131323	0.130722	0.135614	0.110868	0.0373376	0.0466585	0.0335963	0.0623332	0.0755232	0.0201881	0.0458171	0.0550132	0.0479336	0.0348126	0.0468373	0.0698716	0.0388303	0.0718536	0.0560919	0.0580731	0.05781	0.0344814
0.221175	BluexRed8	-0.221135	0.0041999	0.144513	0.169384	0.125839	0.180924	0.148532	0.181568	0.174595	0.171974	0.189342	0.161405	0.203675	0.18561	0.121717	0.126203	0.1031	0.146013	0.111786	0.112436	0.12763	0.125177	0.143147	0.140146	0.145599	0.120061	0.0240865	0.0295239	0.0222336	0.0441073	0.0599507	0.0410967	0.0427395	0.0498777	0.0369822	0.0319621	0.0305447	0.0716384	0.0350779	0.076992	0.0598075	0.0568656	0.0389886	0.0178113	0.0209947
0.219683	BluexRed9	-0.218312	-0.0245056	0.170155	0.191867	0.149644	0.204184	0.173495	0.202858	0.197662	0.195411	0.212017	0.185392	0.224538	0.208184	0.0930236	0.0980591	0.076194	0.117656	0.0831656	0.0865041	0.0990261	0.0970149	0.116196	0.112024	0.117672	0.0919697	0.0189663	0.0306467	0.0150941	0.0451687	0.0522529	0.0400539	0.016235	0.0254565	0.0225057	0.00541339	0.0292162	0.043044	0.00941759	0.0482025	0.0309756	0.0292418	0.042805	0.0234435	0.0296006	0.0288439
0.176376	BluexRed10	-0.146535	-0.0981641	0.271172	0.294643	0.251967	0.306786	0.275141	0.305696	0.300316	0.297944	0.314773	0.287677	0.327322	0.310956	0.0760383	0.0897754	0.0967501	0.0948533	0.0762268	0.107451	0.080647	0.0891001	0.113266	0.0962898	0.102312	0.0884754	0.103055	0.103117	0.104431	0.0988748	0.0806728	0.138317	0.0866124	0.0777213	0.0900703	0.0977942	0.100843	0.0684034	0.0938604	0.0752365	0.0820019	0.0750054	0.103556	0.110605	0.132407	0.126663	0.102847
0.194446	BluexRed11	-0.19435	0.00612995	0.160105	0.188799	0.144393	0.19937	0.165141	0.202015	0.193326	0.190307	0.208362	0.179184	0.224324	0.204771	0.126289	0.13335	0.11369	0.152077	0.117067	0.124625	0.132702	0.132275	0.153257	0.14719	0.153227	0.127479	0.0207693	0.0125587	0.0239281	0.019548	0.0383237	0.0665043	0.0441009	0.0463671	0.0289773	0.0380658	0.0151139	0.0732275	0.0385788	0.0821095	0.0654302	0.0570097	0.013856	0.015725	0.0470895	0.0268548	0.0388939	0.114732
0.249336	BluexRed12	-0.24251	-0.0579431	0.190442	0.204794	0.166684	0.218343	0.192132	0.213172	0.211592	0.210159	0.224791	0.201567	0.233486	0.220848	0.063656	0.0641504	0.0385604	0.084342	0.0536411	0.0468217	0.0682806	0.0632372	0.0780682	0.0775992	0.0822972	0.0580231	0.0598253	0.0710645	0.0562616	0.0839433	0.0851968	0.0451138	0.0416994	0.0477989	0.0583934	0.0426066	0.0692377	0.0365025	0.0434003	0.0291847	0.0261108	0.039243	0.0826873	0.0646919	0.0534102	0.0657165	0.0412749	0.104063
				Blue 1	Blue 2	Blue 3	Blue 4	Blue 5	Blue 6	Blue 7	Blue 8	Blue 9	Blue 10	Blue 11	Blue 12	Red 1	Red 2	Red 3	Red 4	Red 5	Red 6	Red 7	Red 8	Red 9	Red 10	Red 11	Red 12	RedxBlue1	RedxBlue2	RedxBlue3	RedxBlue4	RedxBlue5	RedxBlue6	RedxBlue7	RedxBlue8	RedxBlue9	RedxBlue10	RedxBlue11	RedxBlue12	BluexRed1	BluexRed2	BluexRed3	BluexRed4	BluexRed5	BluexRed6	BluexRed7	BluexRed8	BluexRed9	BluexRed10
[truncated: 2 more columns]

## Sheet: Appendix 2
	Discrimination probabilities by Apis mellifera between pairs of flowers calculated by the function f(V)=MoK/(Mo + (K −Mo) exp(−rV)); where V is the Euclidean distance in Chittka hexagon, K=1, Mo=0.491 and r=78.7
	Blue 1	Blue 2	Blue 3	Blue 4	Blue 5	Blue 6	Blue 7	Blue 8	Blue 9	Blue 10	Blue 11	Blue 12	Red 1	Red 2	Red 3	Red 4	Red 5	Red 6	Red 7	Red 8	Red 9	Red 10	Red 11	Red 12	RedxBlue1	RedxBlue2	RedxBlue3	RedxBlue4	RedxBlue5	RedxBlue6	RedxBlue7	RedxBlue8	RedxBlue9	RedxBlue10	RedxBlue11	RedxBlue12	BluexRed1	BluexRed2	BluexRed3	BluexRed4	BluexRed5	BluexRed6	BluexRed7	BluexRed8	BluexRed9	BluexRed10	BluexRed11	BluexRed12
Blue 1
Blue 2	0.960632
Blue 3	0.888124	0.96998
Blue 4	0.969811	0.751373	0.986659
Blue 5	0.65498	0.925568	0.880612	0.945953
Blue 6	0.988981	0.78027	0.99021	0.831047	0.978618
Blue 7	0.959477	0.647323	0.97848	0.621827	0.92562	0.813952
Blue 8	0.943514	0.686226	0.973295	0.663466	0.898778	0.862073	0.582404
Blue 9	0.986466	0.825228	0.993296	0.687316	0.975207	0.784112	0.761189	0.811133
Blue 10	0.869862	0.788404	0.941442	0.831938	0.777556	0.930553	0.774487	0.711225	0.916409
Blue 11	0.997628	0.948448	0.998284	0.933221	0.995456	0.848556	0.944998	0.960913	0.864213	0.983802
Blue 12	0.983572	0.776995	0.991141	0.658077	0.969521	0.745601	0.713154	0.775792	0.568294	0.897863	0.875836
Red 1	1	1	1	1	1	1	1	1	1	1	1	1
Red 2	1	1	1	1	1	1	1	1	1	1	1	1	0.739919
Red 3	1	1	1	1	1	1	1	1	1	1	1	1	0.91891	0.888777
Red 4	1	1	1	1	1	1	1	1	1	1	1	1	0.884399	0.825434	0.97431
Red 5	1	1	1	1	1	1	1	1	1	1	1	1	0.682004	0.795538	0.862864	0.938163
Red 6	1	1	1	1	1	1	1	1	1	1	1	1	0.945152	0.892875	0.722615	0.96968	0.922677
Red 7	1	1	1	1	1	1	1	1	1	1	1	1	0.619419	0.68474	0.931501	0.819454	0.770709	0.945405
Red 8	1	1	1	1	1	1	1	1	1	1	1	1	0.729563	0.512286	0.882864	0.835833	0.781849	0.890576	0.681617
Red 9	1	1	1	1	1	1	1	1	1	1	1	1	0.950075	0.86959	0.957621	0.859761	0.962878	0.922095	0.926463	0.877623
Red 10	1	1	1	1	1	1	1	1	1	1	1	1	0.859069	0.743266	0.955785	0.63897	0.91493	0.945865	0.786608	0.758686	0.801058
Red 11	1	1	1	1	1	1	1	1	1	1	1	1	0.911391	0.821925	0.968137	0.661835	0.946952	0.955466	0.861349	0.834013	0.753031	0.619442
Red 12	1	1	1	1	1	1	1	1	1	1	1	1	0.735771	0.610794	0.836579	0.884774	0.736865	0.861654	0.729888	0.592647	0.900382	0.824144	0.880069
RedxBlue1	0.999998	1	0.999992	1	0.999999	1	1	1	1	1	1	1	0.99976	0.999857	0.999309	0.999968	0.999496	0.999708	0.999854	0.999844	0.999969	0.999952	0.99997	0.999772
RedxBlue2	0.999998	1	0.999994	1	0.999999	1	1	1	1	1	1	1	0.999871	0.999928	0.999685	0.999983	0.999736	0.99987	0.999922	0.999922	0.999986	0.999976	0.999985	0.999886	0.708911
RedxBlue3	0.999998	1	0.999991	1	0.999998	1	1	1	1	0.999999	1	1	0.999724	0.99983	0.999139	0.999962	0.999415	0.99963	0.999831	0.999815	0.999962	0.999943	0.999964	0.999728	0.575481	0.772494
RedxBlue4	0.999999	1	0.999997	1	0.999999	1	1	1	1	1	1	1	0.999923	0.999961	0.999857	0.99999	0.99985	0.999944	0.999954	0.999958	0.999993	0.999986	0.999992	0.99994	0.890173	0.770395	0.919288
RedxBlue5	1	1	0.999999	1	1	1	1	1	1	1	1	1	0.999839	0.999928	0.999799	0.99998	0.99971	0.999924	0.999904	0.999921	0.999988	0.999974	0.999984	0.999892	0.951169	0.914012	0.963546	0.816314
RedxBlue6	0.999989	0.999997	0.999928	0.999999	0.99999	0.999998	0.999998	0.999998	0.999999	0.999995	1	0.999999	0.999801	0.999802	0.998417	0.999959	0.999562	0.998992	0.999862	0.999788	0.999918	0.999929	0.999949	0.999681	0.985059	0.993487	0.979327	0.998119	0.999206
RedxBlue7	1	1	0.999998	1	1	1	1	1	1	1	1	1	0.998424	0.999078	0.995961	0.99979	0.99671	0.998367	0.999043	0.998997	0.999813	0.99969	0.999807	0.998539	0.863847	0.926183	0.850173	0.966201	0.968083	0.985931
RedxBlue8	1	1	0.999999	1	1	1	1	1	1	1	1	1	0.998161	0.999028	0.996488	0.999764	0.996324	0.998639	0.998899	0.998942	0.999821	0.999666	0.999796	0.998491	0.898803	0.933309	0.898494	0.960671	0.949504	0.993363	0.673302
RedxBlue9	0.999999	1	0.999997	1	1	1	1	1	1	1	1	1	0.999527	0.999742	0.998952	0.999939	0.999042	0.99958	0.999716	0.999719	0.99995	0.999912	0.999946	0.999596	0.728655	0.780289	0.759818	0.879835	0.909317	0.99211	0.790611	0.79172
RedxBlue10	0.999999	1	0.999995	1	0.999999	1	1	1	1	1	1	1	0.999193	0.999485	0.997348	0.999888	0.998269	0.998862	0.999502	0.99944	0.999884	0.999828	0.999891	0.999173	0.791042	0.900598	0.748514	0.963448	0.976213	0.971641	0.70161	0.8255	0.799064
RedxBlue11	0.999999	1	0.999995	1	0.999999	1	1	1	1	1	1	1	0.999843	0.999913	0.999624	0.99998	0.999679	0.999846	0.999905	0.999905	0.999983	0.999971	0.999982	0.999863	0.691238	0.541248	0.758765	0.777491	0.90726	0.993335	0.912746	0.919783	0.744289	0.887425
RedxBlue12	1	1	1	1	1	1	1	1	1	1	1	1	0.984439	0.991773	0.975829	0.997968	0.969205	0.990859	0.990607	0.991049	0.998548	0.99714	0.998258	0.9874	0.985073	0.991599	0.983494	0.995157	0.991834	0.996275	0.9102	0.892603	0.969923	0.956517	0.989797
BluexRed1	0.999999	1	0.999996	1	0.999999	1	1	1	1	1	1	1	0.999058	0.999422	0.997204	0.999872	0.998003	0.998829	0.999423	0.999371	0.999875	0.999807	0.999878	0.999076	0.797293	0.897711	0.767429	0.959267	0.970336	0.978843	0.638594	0.775445	0.766263	0.569894	0.882164	0.946863
BluexRed2	1	1	1	1	1	1	1	1	1	1	1	1	0.970616	0.981976	0.939029	0.995857	0.9391	0.976288	0.981682	0.980414	0.9965	0.993854	0.996178	0.971841	0.992061	0.995954	0.990737	0.997918	0.996804	0.995794	0.95052	0.949837	0.985772	0.973091	0.995117	0.718758	0.969014
BluexRed3	1	1	0.999999	1	1	1	1	1	1	1	1	1	0.992293	0.995139	0.978566	0.998921	0.983576	0.99139	0.995225	0.994716	0.998981	0.998369	0.998975	0.992261	0.970583	0.985567	0.965239	0.993325	0.991888	0.98863	0.840083	0.863721	0.952687	0.902829	0.982749	0.748196	0.890671	0.789936
BluexRed4	1	1	0.999999	1	1	1	1	1	1	1	1	1	0.995597	0.997606	0.991401	0.999427	0.991085	0.996683	0.997348	0.997394	0.999555	0.999181	0.999498	0.996273	0.949092	0.970581	0.945084	0.983807	0.977418	0.993075	0.747068	0.705837	0.900484	0.873749	0.964461	0.775625	0.842847	0.883887	0.737217
BluexRed5	0.999999	1	0.999996	1	0.999999	1	1	1	1	1	1	1	0.999932	0.999964	0.999859	0.999991	0.999865	0.999943	0.999959	0.999961	0.999993	0.999988	0.999993	0.999945	0.864903	0.717537	0.899405	0.60179	0.872621	0.997418	0.965429	0.963512	0.877969	0.958152	0.73783	0.995615	0.955189	0.998041	0.993385	0.984881
BluexRed6	0.999997	1	0.999987	1	0.999998	1	1	1	1	0.999999	1	1	0.999865	0.999917	0.999577	0.999982	0.999715	0.999816	0.999918	0.99991	0.999982	0.999972	0.999983	0.999867	0.643288	0.716794	0.664625	0.896237	0.964172	0.983821	0.919596	0.943148	0.82982	0.858721	0.72645	0.991739	0.87124	0.995461	0.982768	0.971605	0.859872
BluexRed7	0.999986	0.999997	0.999922	0.999999	0.999989	0.999999	0.999998	0.999998	0.999999	0.999995	1	0.999999	0.999876	0.999896	0.999255	0.999979	0.999724	0.999595	0.999918	0.999888	0.999966	0.999965	0.999976	0.999832	0.947968	0.97432	0.931376	0.992382	0.997289	0.825318	0.97261	0.986527	0.976715	0.937247	0.97467	0.995777	0.953467	0.996384	0.98761	0.98938	0.98916	0.935697
BluexRed8	0.999988	0.999998	0.999948	0.999999	0.999991	0.999999	0.999999	0.999999	1	0.999997	1	1	0.999928	0.99995	0.99969	0.999989	0.999843	0.999851	0.999955	0.999945	0.999987	0.999983	0.999989	0.999918	0.865251	0.907839	0.847326	0.968788	0.990826	0.960771	0.965364	0.979952	0.946571	0.922686	0.914344	0.996323	0.938464	0.997584	0.990723	0.988334	0.954017	0.796692	0.834281
BluexRed9	0.999998	1	0.999992	1	0.999999	1	1	1	1	1	1	1	0.999315	0.999539	0.997428	0.999901	0.998512	0.998856	0.999573	0.999499	0.999889	0.999846	0.999901	0.999255	0.811018	0.91497	0.759858	0.971217	0.983313	0.957558	0.775858	0.877334	0.850076	0.59629	0.905793	0.966156	0.669331	0.977191	0.916963	0.905964	0.965535	0.859241	0.908342	0.903263
BluexRed10	1	1	1	1	1	1	1	1	1	1	1	1	0.997396	0.999115	0.999489	0.999407	0.997435	0.99978	0.998187	0.999067	0.999861	0.99947	0.99967	0.99902	0.999689	0.99969	0.999721	0.999567	0.998191	0.999981	0.998865	0.997719	0.999136	0.999529	0.99963	0.995262	0.999358	0.997227	0.99837	0.997176	0.999701	0.999828	0.999969	0.999951	0.999684
BluexRed11	0.999997	1	0.999988	1	0.999998	1	1	1	1	0.999999	1	1	0.99995	0.999971	0.999865	0.999993	0.999897	0.999943	0.99997	0.999969	0.999994	0.99999	0.999994	0.999954	0.831814	0.721591	0.863791	0.817935	0.951666	0.994502	0.968773	0.97374	0.904176	0.950723	0.760143	0.996754	0.952581	0.998384	0.99402	0.988464	0.741632	0.7688	0.975155	0.888694	0.953689	0.999876
BluexRed12	1	1	0.999998	1	1	1	1	1	1	1	1	1	0.99313	0.993391	0.952515	0.998644	0.985014	0.974639	0.995216	0.992902	0.99778	0.997697	0.998407	0.989339	0.990735	0.996154	0.987773	0.998601	0.998732	0.971096	0.96252	0.976472	0.989642	0.965012	0.995562	0.94463	0.967061	0.905581	0.882769	0.954887	0.998455	0.993665	0.984744	0.994153	0.961296	0.999712	0.998115
	Blue 1	Blue 2	Blue 3	Blue 4	Blue 5	Blue 6	Blue 7	Blue 8	Blue 9	Blue 10	Blue 11	Blue 12	Red 1	Red 2	Red 3	Red 4	Red 5	Red 6	Red 7	Red 8	Red 9	Red 10	Red 11	Red 12	RedxBlue1	RedxBlue2	RedxBlue3	RedxBlue4	RedxBlue5	RedxBlue6	RedxBlue7	RedxBlue8	RedxBlue9	RedxBlue10	RedxBlue11	RedxBlue12	BluexRed1	BluexRed2	BluexRed3	BluexRed4	BluexRed5	BluexRed6	BluexRed7	BluexRed8	BluexRed9	BluexRed10	BluexRed11	BluexRed12

## Sheet: Appendix 3
	Discrimination probabilities by Bombus terrestris between pairs of flowers calculated by the function f(V)=MoK/(Mo + (K −Mo) exp(−rV)); where V is the Euclidean distance in Chittka hexagon, K=0.999, Mo=0.320 and r=92.3
	Blue 1	Blue 2	Blue 3	Blue 4	Blue 5	Blue 6	Blue 7	Blue 8	Blue 9	Blue 10	Blue 11	Blue 12	Red 1	Red 2	Red 3	Red 4	Red 5	Red 6	Red 7	Red 8	Red 9	Red 10	Red 11	Red 12	RedxBlue1	RedxBlue2	RedxBlue3	RedxBlue4	RedxBlue5	RedxBlue6	RedxBlue7	RedxBlue8	RedxBlue9	RedxBlue10	RedxBlue11	RedxBlue12	BluexRed1	BluexRed2	BluexRed3	BluexRed4	BluexRed5	BluexRed6	BluexRed7	BluexRed8	BluexRed9	BluexRed10	BluexRed11	BluexRed12
Blue 1
Blue 2	0.953247
Blue 3	0.847237	0.965655
Blue 4	0.965436	0.642032	0.986107
Blue 5	0.509913	0.903402	0.835809	0.932885
Blue 6	0.988698	0.684166	0.990033	0.76026	0.976583
Blue 7	0.95168	0.500041	0.976414	0.467868	0.903479	0.734406
Blue 8	0.929422	0.551185	0.96992	0.520965	0.863382	0.807527	0.42027
Blue 9	0.985888	0.751439	0.993252	0.552653	0.972341	0.68984	0.656231	0.730162
Blue 10	0.819417	0.696199	0.926463	0.761612	0.680168	0.910712	0.675655	0.585311	0.889842
Blue 11	0.997302	0.936409	0.997839	0.9146	0.995358	0.786901	0.931531	0.953628	0.810794	0.982811
Blue 12	0.982541	0.679341	0.991026	0.513932	0.965059	0.63374	0.587983	0.677572	0.403873	0.861998	0.82853
Red 1	0.999	0.999	0.999	0.999	0.999	0.999	0.999	0.999	0.999	0.999	0.999	0.999
Red 2	0.999	0.999	0.999	0.999	0.999	0.999	0.999	0.999	0.999	0.999	0.999	0.999	0.625622
Red 3	0.999	0.999	0.999	0.999	0.999	0.999	0.999	0.999	0.999	0.999	0.999	0.999	0.89356	0.848228
Red 4	0.999	0.999	0.999	0.999	0.999	0.999	0.999	0.999	0.999	0.999	0.999	0.999	0.841573	0.75175	0.971209
Red 5	0.999	0.999	0.999	0.999	0.999	0.999	0.999	0.999	0.999	0.999	0.999	0.999	0.545516	0.706807	0.808736	0.921755
Red 6	0.999	0.999	0.999	0.999	0.999	0.999	0.999	0.999	0.999	0.999	0.999	0.999	0.93175	0.854447	0.60117	0.965266	0.899138
Red 7	0.999	0.999	0.999	0.999	0.999	0.999	0.999	0.999	0.999	0.999	0.999	0.999	0.464885	0.549186	0.912095	0.742707	0.670115	0.93211
Red 8	0.999	0.999	0.999	0.999	0.999	0.999	0.999	0.999	0.999	0.999	0.999	0.999	0.610937	0.3421	0.839237	0.767529	0.686496	0.850959	0.544998
Red 9	0.999	0.999	0.999	0.999	0.999	0.999	0.999	0.999	0.999	0.999	0.999	0.999	0.938693	0.819002	0.949148	0.803998	0.956274	0.898278	0.904718	0.831255
Red 10	0.999	0.999	0.999	0.999	0.999	0.999	0.999	0.999	0.999	0.999	0.999	0.999	0.802941	0.630399	0.946627	0.489381	0.887639	0.932761	0.693535	0.652598	0.715049
Red 11	0.999	0.999	0.999	0.999	0.999	0.999	0.999	0.999	0.999	0.999	0.999	0.999	0.882353	0.74644	0.963252	0.518832	0.934299	0.946187	0.806423	0.764763	0.644422	0.464914
Red 12	0.999	0.999	0.999	0.999	0.999	0.999	0.999	0.999	0.999	0.999	0.999	0.999	0.619723	0.454283	0.768663	0.842143	0.621276	0.806888	0.611396	0.432384	0.865803	0.749798	0.834981
RedxBlue1	0.999	0.999	0.998998	0.999	0.999	0.999	0.999	0.999	0.999	0.999	0.999	0.999	0.998884	0.998937	0.998601	0.998989	0.998724	0.998855	0.998936	0.998931	0.99899	0.998983	0.99899	0.998891
RedxBlue2	0.999	0.999	0.998998	0.999	0.999	0.999	0.999	0.999	0.999	0.999	0.999	0.999	0.998944	0.998972	0.998841	0.998995	0.998871	0.998944	0.998969	0.998969	0.998996	0.998992	0.998996	0.998952	0.582112
RedxBlue3	0.999	0.999	0.998998	0.999	0.999	0.999	0.999	0.999	0.999	0.999	0.999	0.999	0.998864	0.998923	0.998483	0.998987	0.998672	0.998808	0.998924	0.998915	0.998987	0.998979	0.998988	0.998866	0.412182	0.672731
RedxBlue4	0.999	0.999	0.998999	0.999	0.999	0.999	0.999	0.999	0.999	0.999	0.999	0.999	0.998969	0.998986	0.998937	0.998997	0.998933	0.998979	0.998983	0.998985	0.998998	0.998996	0.998998	0.998977	0.850348	0.669655	0.894121
RedxBlue5	0.999	0.999	0.999	0.999	0.999	0.999	0.999	0.999	0.999	0.999	0.999	0.999	0.998928	0.998972	0.998906	0.998994	0.998856	0.99897	0.998961	0.998969	0.998997	0.998991	0.998995	0.998955	0.940223	0.886269	0.95717	0.737966
RedxBlue6	0.998997	0.998999	0.998972	0.999	0.998997	0.999	0.999	0.999	0.999	0.998999	0.999	0.999	0.998907	0.998908	0.997944	0.998986	0.998766	0.998378	0.998939	0.9989	0.998967	0.998972	0.998981	0.998839	0.984275	0.993443	0.977452	0.997706	0.99853
RedxBlue7	0.999	0.999	0.999	0.999	0.999	0.999	0.999	0.999	0.999	0.999	0.999	0.999	0.997949	0.99844	0.995829	0.998901	0.996507	0.997904	0.998414	0.998381	0.998914	0.998844	0.998911	0.998038	0.810235	0.904306	0.789367	0.960703	0.96318	0.985278
RedxBlue8	0.999	0.999	0.999	0.999	0.999	0.999	0.999	0.999	0.999	0.999	0.999	0.999	0.997741	0.998404	0.996309	0.998887	0.996161	0.998115	0.99831	0.998341	0.998918	0.99883	0.998905	0.998001	0.86342	0.914728	0.862953	0.9533	0.937892	0.993319	0.533924
RedxBlue9	0.999	0.999	0.998999	0.999	0.999	0.999	0.999	0.999	0.999	0.999	0.999	0.999	0.998744	0.998874	0.998349	0.998977	0.998414	0.998778	0.998859	0.998861	0.998982	0.998965	0.99898	0.998787	0.609657	0.684194	0.654241	0.834625	0.879246	0.992039	0.699475	0.701124
RedxBlue10	0.999	0.999	0.998999	0.999	0.999	0.999	0.999	0.999	0.999	0.999	0.999	0.999	0.998521	0.998717	0.997065	0.998953	0.997827	0.998283	0.998728	0.998688	0.998951	0.998922	0.998954	0.998507	0.700115	0.86613	0.63792	0.957039	0.973603	0.967802	0.572071	0.75185	0.71207
RedxBlue11	0.999	0.999	0.998999	0.999	0.999	0.999	0.999	0.999	0.999	0.999	0.999	0.999	0.99893	0.998965	0.998804	0.998994	0.998838	0.998931	0.998961	0.998961	0.998995	0.99899	0.998994	0.99894	0.557949	0.373384	0.652714	0.680072	0.876159	0.99329	0.884379	0.894855	0.631861	0.846174
RedxBlue12	0.999	0.999	0.999	0.999	0.999	0.999	0.999	0.999	0.999	0.999	0.999	0.999	0.983555	0.99169	0.973122	0.997584	0.964648	0.990727	0.990459	0.990929	0.998045	0.996885	0.997818	0.986943	0.984291	0.991507	0.982449	0.995076	0.991753	0.996116	0.88057	0.854035	0.965582	0.947633	0.989588
BluexRed1	0.999	0.999	0.998999	0.999	0.999	0.999	0.999	0.999	0.999	0.999	0.999	0.999	0.998426	0.998676	0.99694	0.998945	0.997612	0.998259	0.998677	0.998643	0.998946	0.99891	0.998948	0.998439	0.709424	0.861768	0.66532	0.951394	0.966117	0.976859	0.488904	0.677062	0.663618	0.405715	0.838172	0.934173
BluexRed2	0.999	0.999	0.999	0.999	0.999	0.999	0.999	0.999	0.999	0.999	0.999	0.999	0.96648	0.980651	0.923001	0.995732	0.923102	0.973697	0.9803	0.978773	0.996319	0.993809	0.996027	0.968059	0.991989	0.995822	0.990597	0.997543	0.996591	0.995674	0.939316	0.93836	0.985096	0.969659	0.995037	0.595778	0.964398
BluexRed3	0.999	0.999	0.999	0.999	0.999	0.999	0.999	0.999	0.999	0.999	0.999	0.999	0.992229	0.995059	0.97652	0.998326	0.982546	0.991288	0.99514	0.994653	0.99837	0.997906	0.998366	0.992196	0.966437	0.98486	0.959428	0.993281	0.99181	0.988313	0.773993	0.810043	0.942339	0.869494	0.98157	0.637463	0.851104	0.698472
BluexRed4	0.999	0.999	0.999	0.999	0.999	0.999	0.999	0.999	0.999	0.999	0.999	0.999	0.99549	0.997284	0.9913	0.998679	0.990967	0.996484	0.997064	0.997104	0.998762	0.998512	0.998725	0.996114	0.937314	0.966434	0.931653	0.982817	0.975102	0.993028	0.635843	0.577875	0.865958	0.825347	0.958393	0.677327	0.778201	0.840794	0.621775
BluexRed5	0.999	0.999	0.998999	0.999	0.999	0.999	0.999	0.999	0.999	0.999	0.999	0.999	0.998974	0.998988	0.998938	0.998998	0.998941	0.998979	0.998986	0.998986	0.998998	0.998996	0.998998	0.998979	0.811847	0.594076	0.864329	0.443348	0.823627	0.997124	0.959679	0.957125	0.831782	0.949874	0.622647	0.995507	0.945806	0.997643	0.99334	0.984069
BluexRed6	0.998999	0.999	0.998996	0.999	0.998999	0.999	0.999	0.999	0.999	0.999	0.999	0.999	0.998941	0.998967	0.998775	0.998994	0.998858	0.998916	0.998967	0.998963	0.998994	0.998991	0.998995	0.998942	0.494877	0.593041	0.522485	0.859539	0.958007	0.982834	0.894577	0.9289	0.758399	0.80241	0.606552	0.991654	0.821519	0.995363	0.981593	0.967756	0.804167
BluexRed7	0.998996	0.998999	0.998969	0.999	0.998997	0.999	0.999	0.999	0.999	0.998999	0.999	0.999	0.998947	0.998957	0.998564	0.998993	0.998864	0.998787	0.998967	0.998953	0.998988	0.998988	0.998992	0.998924	0.935733	0.971221	0.911913	0.992321	0.997014	0.751575	0.969045	0.985958	0.974229	0.920434	0.971663	0.995658	0.943423	0.996215	0.987179	0.989135	0.988895	0.918192
BluexRed8	0.998997	0.999	0.998981	0.999	0.998998	0.999	0.999	0.999	0.999	0.998999	0.999	0.999	0.998972	0.998981	0.998844	0.998997	0.99893	0.998934	0.998984	0.99898	0.998996	0.998995	0.998997	0.998967	0.812379	0.877029	0.785025	0.964103	0.990692	0.953435	0.959593	0.978213	0.933761	0.899152	0.886764	0.996159	0.922188	0.997265	0.990582	0.987985	0.944185	0.708529	0.765171
BluexRed9	0.999	0.999	0.998998	0.999	0.999	0.999	0.999	0.999	0.999	0.999	0.999	0.999	0.998604	0.998751	0.997133	0.998959	0.998018	0.998278	0.998773	0.998726	0.998953	0.998931	0.998959	0.998564	0.729991	0.887698	0.654299	0.967256	0.982237	0.949061	0.67767	0.830814	0.789219	0.436736	0.873955	0.960643	0.528673	0.974821	0.890666	0.874213	0.959821	0.803204	0.877785	0.870147
BluexRed10	0.999	0.999	0.999	0.999	0.999	0.999	0.999	0.999	0.999	0.999	0.999	0.999	0.997106	0.998466	0.99872	0.998666	0.997138	0.998896	0.997761	0.998432	0.998939	0.998707	0.998832	0.998398	0.998843	0.998844	0.998862	0.998769	0.997764	0.998994	0.998285	0.997378	0.998481	0.998745	0.998808	0.995175	0.998634	0.996961	0.997907	0.996917	0.99885	0.998922	0.99899	0.998982	0.99884
BluexRed11	0.998999	0.999	0.998997	0.999	0.998999	0.999	0.999	0.999	0.999	0.999	0.999	0.999	0.998982	0.99899	0.998941	0.998998	0.998957	0.998979	0.99899	0.998989	0.998998	0.998997	0.998998	0.998984	0.761425	0.599737	0.81015	0.740413	0.940917	0.994445	0.964083	0.970486	0.871523	0.939601	0.654712	0.996546	0.942192	0.997918	0.993973	0.988129	0.628064	0.667323	0.972276	0.848103	0.94373	0.998947
BluexRed12	0.999	0.999	0.999	0.999	0.999	0.999	0.999	0.999	0.999	0.999	0.999	0.999	0.993084	0.993346	0.9421	0.998119	0.984223	0.971625	0.995131	0.992852	0.997429	0.997359	0.997936	0.98909	0.990596	0.996005	0.987361	0.998086	0.998186	0.9671	0.955794	0.973927	0.98942	0.959126	0.995457	0.931008	0.961837	0.873636	0.839093	0.945388	0.997974	0.993621	0.983909	0.994104	0.954145	0.998857	0.997704
	Blue 1	Blue 2	Blue 3	Blue 4	Blue 5	Blue 6	Blue 7	Blue 8	Blue 9	Blue 10	Blue 11	Blue 12	Red 1	Red 2	Red 3	Red 4	Red 5	Red 6	Red 7	Red 8	Red 9	Red 10	Red 11	Red 12	RedxBlue1	RedxBlue2	RedxBlue3	RedxBlue4	RedxBlue5	RedxBlue6	RedxBlue7	RedxBlue8	RedxBlue9	RedxBlue10	RedxBlue11	RedxBlue12	BluexRed1	BluexRed2	BluexRed3	BluexRed4	BluexRed5	BluexRed6	BluexRed7	BluexRed8	BluexRed9	BluexRed10	BluexRed11	BluexRed12
